# Supplementary material
Source: PubMed Central journal article supplement (PMC3177971)
Supplement: NIHMS319660-supplement-01.pdf [file NIHMS319660-supplement-01.pdf]

**Supplementary Table 1. Oligonucleotides used for plasmid construction**

|                                 | PAN Insert                    | Direction | oligo #                                              | Sequence                                     |
|---------------------------------|-------------------------------|-----------|------------------------------------------------------|----------------------------------------------|
| <b>β-globin Plasmids</b>        | Full length<br>ORE, 1-315     | Forward   | NC640                                                | tatataGCGGCCGCactgggactgccagtcacc            |
|                                 |                               | Reverse   | NC641                                                | ttttaaCTCGAGaatccaatgcaataaccgcaagg          |
|                                 | 1-79                          | Forward   | NC640                                                | tatataGCGGCCGCactgggactgccagtcacc            |
|                                 |                               | Reverse   | NC642                                                | ttttaaCTCGAGccagaagcggaagaaggcaagca          |
|                                 | 79-158                        | Forward   | NC643                                                | tatataGCGGCCGCgttttcattggtgccgccga           |
|                                 |                               | Reverse   | NC644                                                | ttttaaCTCGAGgaaaacctagccgaaagccaggat         |
|                                 | 158-237                       | Forward   | NC645                                                | tatataGCGGCCGCccgtcctacttttccacat            |
|                                 |                               | Reverse   | NC646                                                | ttttaaCTCGAGtgcgggcttatggagagctccaga         |
|                                 | 237-315                       | Forward   | NC647                                                | tatataGCGGCCGCagaacaaaagctgcgattg            |
|                                 |                               | Reverse   | NC641                                                | ttttaaCTCGAGaatccaatgcaataaccgcaagg          |
|                                 | 79-315                        | Forward   | NC675                                                | tatataGCGGCCGCgttttcattggtgccgccga           |
|                                 |                               | Reverse   | NC641                                                | ttttaaCTCGAGaatccaatgcaataaccgcaagg          |
|                                 | ΔSL2                          | Forward   | NC640                                                | tatataGCGGCCGCactgggactgccagtcacc            |
|                                 |                               | Reverse   | NC676                                                | ttttaaCTCGAGccagaagcggaagaaaagg              |
|                                 | SL2                           | Forward   | NC678                                                | tatataGCGGCCGCggctgccgcttcacctatgg           |
|                                 |                               | Reverse   | NC673                                                | ttttaaCTCGAGggcaagcagcagcacaataatcc          |
| SL2-B                           | Forward                       | NC759     | <u>GGCCGC</u> ggctgccgcttcgctcgtgctgtgcc <u>C</u>    |                                              |
|                                 | Reverse                       | NC760     | <u>TCGAG</u> ggcaagcagcagcgaagcggcagcc <u>GC</u>     |                                              |
| SL2-T                           | Forward                       | NC761     | <u>GGCCGC</u> ccgcttcacctatggattttgtcgtcgtg <u>C</u> |                                              |
|                                 | Reverse                       | NC762     | <u>TCGAG</u> cagcagcacaataatcataggtgaagcgg <u>GC</u> |                                              |
| <b>PAN Plasmids</b>             | PANΔ79-<br>ΔSL2               | Forward-1 | NC843                                                | ggctaacctgt <u>CCAAAATATGG</u> gaacactggag   |
|                                 |                               | Reverse-1 | NC845                                                | gaaaaccagaagcggcaagaaaaggtgactgggcagtccca    |
|                                 |                               | Forward-2 | NC844                                                | tgggactgccagtcaccttttctgcccgttctggttttc      |
|                                 |                               | Reverse-2 | NC846                                                | ctgtatagttg <u>CCATGG</u> caagggttttg        |
|                                 | PANΔ79-<br>ΔSL2-T             | Forward-1 | NC843                                                | ggctaacctgt <u>CCAAAATATGG</u> gaacactggag   |
|                                 |                               | Reverse-1 | NC847                                                | cagaagcggcaagaaggcaagcagccaaggtgactgggcag    |
|                                 |                               | Forward-2 | NC848                                                | ctgcccagtcacctggctgctgccttctgcccgttctg       |
|                                 |                               | Reverse-2 | NC846                                                | ctgtatagttg <u>CCATGG</u> caagggttttg        |
|                                 | PANΔ79-<br>Δ79-315            | Forward-1 | NC843                                                | ggctaacctgt <u>CCAAAATATGG</u> gaacactggag   |
|                                 |                               | Reverse-1 | NC854                                                | ctacaactggcctggagattgcagaagcggcaagaaggcaag   |
|                                 |                               | Forward-2 | NC853                                                | ctgccccttctgcccgttctgcaatctccaggccagttgtag   |
|                                 |                               | Reverse-2 | NC855                                                | cattaacattgaag <u>AGCGCT</u> cccagctgccgc    |
|                                 | PANΔ79-<br>Δ34-50             | Forward-1 | NC843                                                | ggctaacctgt <u>CCAAAATATGG</u> gaacactggag   |
|                                 |                               | Reverse-1 | NC857                                                | gcaagaaggcaagcagcagagaagcggcagccaaggtgactg   |
|                                 |                               | Forward-2 | NC856                                                | cagtcacctggctgccgcttctgctgcttgccttctgc       |
|                                 |                               | Reverse-2 | NC846                                                | ctgtatagttg <u>CCATGG</u> caagggttttg        |
|                                 | CMV<br>UG→AA <sub>40-41</sub> | Forward-1 | NC872                                                | agtctt <u>AAGCTT</u> actgggactgccagtcacc     |
|                                 |                               | Reverse-1 | NC925                                                | ggcaagcagcagcacaataatcttaggtgaagcggcagccaagg |
|                                 |                               | Forward-2 | NC924                                                | ccttggctgccgttcacctaagattttgtcgtcgtgcttgc    |
|                                 |                               | Reverse-2 | NC10                                                 | gggggccgctcacatttagggcaaatggtg               |
| CMV<br>GAU→AAA <sub>42-44</sub> | Forward-1                     | NC872     | agtctt <u>AAGCTT</u> actgggactgccagtcacc             |                                              |
|                                 | Reverse-1                     | NC927     | ggcaagcagcagcacaataatcttaggtgaagcggcagccaagg         |                                              |
|                                 | Forward-2                     | NC926     | ccttggctgccgttcacctatgaaattttgtcgtcgtgcttgc          |                                              |
|                                 | Reverse-2                     | NC10      | gggggccgctcacatttagggcaaatggtg                       |                                              |
| CMV<br>UUU→AAA <sub>45-47</sub> | Forward-1                     | NC872     | agtctt <u>AAGCTT</u> actgggactgccagtcacc             |                                              |
|                                 | Reverse-1                     | NC929     | ggcaagcagcagcactttatccataggtgaagcggcagccaagg         |                                              |
|                                 | Forward-2                     | NC928     | ccttggctgccgttcacctatggataaagtgtcgtcgtgcttgc         |                                              |
|                                 | Reverse-2                     | NC10      | gggggccgctcacatttagggcaaatggtg                       |                                              |

Underlined sequences show relevant restriction sites used for cloning.

**Supplementary Table 2. Oligonucleotides used for T7-DNA templates**

| PAN fragments            | Direction | oligo # | Sequence                                                          |
|--------------------------|-----------|---------|-------------------------------------------------------------------|
| Full length ORE          | Forward   | NC580   | <b>taatac</b> <b>gactcactataggg</b> actgggactgcccagtcacc          |
|                          | Reverse   | NC581   | aatccaatgcaataacccgcaagg                                          |
| Control                  | Forward   | NC582   | <b>taatac</b> <b>gactcactataggg</b> gggtggcatttgcagaagtt          |
|                          | Reverse   | NC583   | taggcacgttaaattgtcaaaagt                                          |
| 1-79                     | Forward   | NC580   | <b>taatac</b> <b>gactcactataggg</b> actgggactgcccagtcacc          |
|                          | Reverse   | NC622   | ccagaagcggcaagaaggcaagca                                          |
| 79-158                   | Forward   | NC612   | <b>taatac</b> <b>gactcactataggg</b> gttttcattggtccgcca            |
|                          | Reverse   | NC614   | gaaaacctagccgaaagccaggat                                          |
| 158-237                  | Forward   | NC613   | <b>taatac</b> <b>gactcactataggg</b> ccgtcctactttccacat            |
|                          | Reverse   | NC615   | tgccggcttatggagagctccaga                                          |
| 237-315                  | Forward   | NC626   | <b>taatac</b> <b>gactcactataggg</b> agaacaaaagctgcgattg           |
|                          | Reverse   | NC581   | aatccaatgcaataacccgcaagg                                          |
| 79-315                   | Forward   | NC612   | <b>taatac</b> <b>gactcactataggg</b> gttttcattggtccgcca            |
|                          | Reverse   | NC581   | aatccaatgcaataacccgcaagg                                          |
| 79-237                   | Forward   | NC612   | <b>taatac</b> <b>gactcactataggg</b> gttttcattggtccgcca            |
|                          | Reverse   | NC615   | tgccggcttatggagagctccaga                                          |
| 158-315                  | Forward   | NC613   | <b>taatac</b> <b>gactcactataggg</b> ccgtcctactttccacat            |
|                          | Reverse   | NC581   | aatccaatgcaataacccgcaagg                                          |
| ΔSL1                     | Forward   | NC630   | <b>taatac</b> <b>gactcactataggg</b> cacctggctgccgcttcac           |
|                          | Reverse   | NC622   | ccagaagcggcaagaaggcaagca                                          |
| ΔSL2                     | Forward   | NC580   | <b>taatac</b> <b>gactcactataggg</b> actgggactgcccagtcacc          |
|                          | Reverse   | NC677   | ccagaagcggcaagaaaagg                                              |
| ΔSL3                     | Forward   | NC580   | <b>taatac</b> <b>gactcactataggg</b> actgggactgcccagtcacc          |
|                          | Reverse   | NC632   | ggcaagcagcgagcacaaaatcca                                          |
| SL2                      | Forward   | NC633   | <b>taatac</b> <b>gactcactataggg</b> ggctgccgcttcacctatgg          |
|                          | Reverse   | NC632   | ggcaagcagcgagcacaaaatcca                                          |
| SL2-T                    | Forward   | NC745   | <b>taatac</b> <b>gactcactataggg</b> ccgcttcacctatggatttggctcgctg  |
|                          | Reverse   | NC746   | cagcgagcacaaaatccataggtgaagcggccctatagtgagtcgtatta                |
| SL2-B                    | Forward   | NC741   | <b>taatac</b> <b>gactcactataggg</b> ggctgccgcttcgctcgctgctgcc     |
|                          | Reverse   | NC742   | ggcaagcagcgagcgaagcggcagccccctatagtgagtcgtatta                    |
| CU→AA <sub>37-38</sub>   | Forward   | NC802   | <b>taatac</b> <b>gactcactataggg</b> ccgcttcacaaatggatttggctcgctg  |
|                          | Reverse   | NC803   | cagcgagcacaaaatccatttgaagcggccctatagtgagtcgtatta                  |
| UG→AA <sub>40-41</sub>   | Forward   | NC804   | <b>taatac</b> <b>gactcactataggg</b> ccgcttcacctaagatttggctcgctg   |
|                          | Reverse   | NC805   | cagcgagcacaaaatcttaggtgaagcggccctatagtgagtcgtatta                 |
| GAU→AAA <sub>42-44</sub> | Forward   | NC806   | <b>taatac</b> <b>gactcactataggg</b> ccgcttcacctatgaaatttggctcgctg |
|                          | Reverse   | NC807   | cagcgagcacaaaatcttaggtgaagcggccctatagtgagtcgtatta                 |
| UUU→AAA <sub>45-47</sub> | Forward   | NC808   | <b>taatac</b> <b>gactcactataggg</b> ccgcttcacctatggataaagtgtcgctg |
|                          | Reverse   | NC809   | cagcgagcactttatccataggtgaagcggccctatagtgagtcgtatta                |
| CAC→GUG <sub>34-36</sub> | Forward   | NC810   | <b>taatac</b> <b>gactcactataggg</b> ccgcttggctatggatttggctcgctg   |
|                          | Reverse   | NC811   | cagcgagcacaaaatccatagcacaagcggccctatagtgagtcgtatta                |
| GUG→CAC <sub>48-50</sub> | Forward   | NC812   | <b>taatac</b> <b>gactcactataggg</b> ccgcttcacctatggatttccacctgctg |
|                          | Reverse   | NC813   | cagcgaggtgaaaatccataggtgaagcggccctatagtgagtcgtatta                |

Bold type highlights the T7 promoter sequence.
